# Supplementary material
Source: Springer Nature journal article supplement (https://www.springermedizin.de/resource/supplementary/12889_2012_4816_MOESM1_ESM.pdf/9490684)

## Determinants

- Focus of approach
- Attributions about dieting failure
- Attitude towards established diets
- Personal autonomy
- Perceived knowledge and self-efficacy with approach
- Time perspective
- Perceived identity

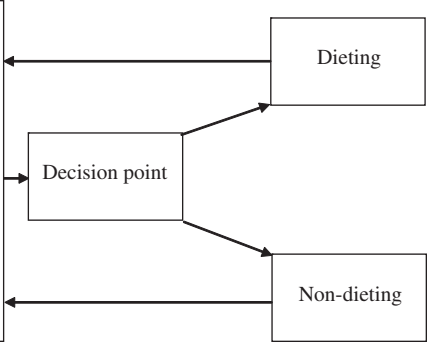

Supplement: MOESM1 [file 9490684]
